# Supplementary material
Source: PubMed Central journal article supplement (PMC5578891)
Supplement: NIHMS887914-supplement-1.pdf [file NIHMS887914-supplement-1.pdf]

## Supplementary Note 1 – Interpretation of complex structural variant examples

Shown below is the example event from Figure 2a for all 7 sarcoma samples. As in Figure 2, orange lines represent read clouds supporting the SV from the major haplotype, cyan lines represent supporting read clouds from the minor haplotype (there are very few of these) and black lines represent supporting read clouds that were not assigned to a haplotype (these are more frequent for the shorter read clouds as they have a lower chance of overlapping an informative single nucleotide polymorphism). Gray lines represent non-supporting read clouds, which result either from independent fragments in the same barcode (so-called “barcode collisions”) or from truly spanning fragments whose closest read is too distant from the breakpoint to be considered as supporting read clouds.

Note that the average fragment lengths are longer in some samples, for example Sarcoma 10, resulting in more fragments that span the entire event from start to end.

The copy number profiles (bottom of each pair) are normalized to the matched control sample, so 2 represents the normal, diploid state. This SV appears to be at copy number 4, since the normal chromosomal DNA is at copy number 2, and the regions included in the SV are at copy number 6. The exception to this pattern is the 5th panel from the left, the 56 mb locus, which has background DNA copy number 3 and the SV region appears to be at copy number 7, again supporting copy number of  $7-3=4$  for the SV.

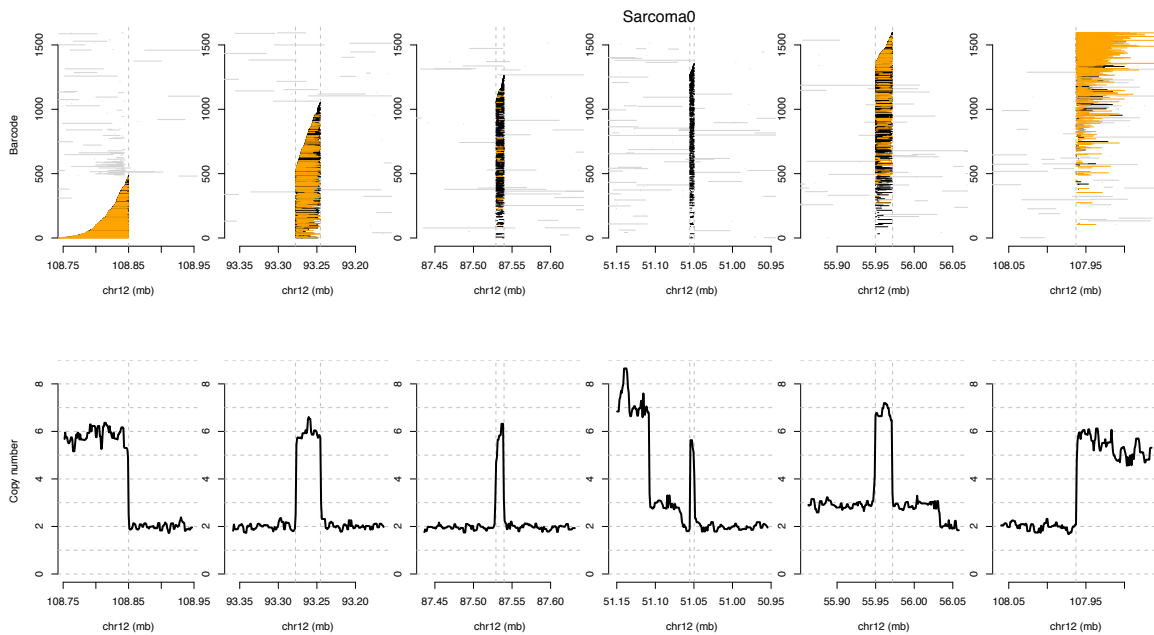

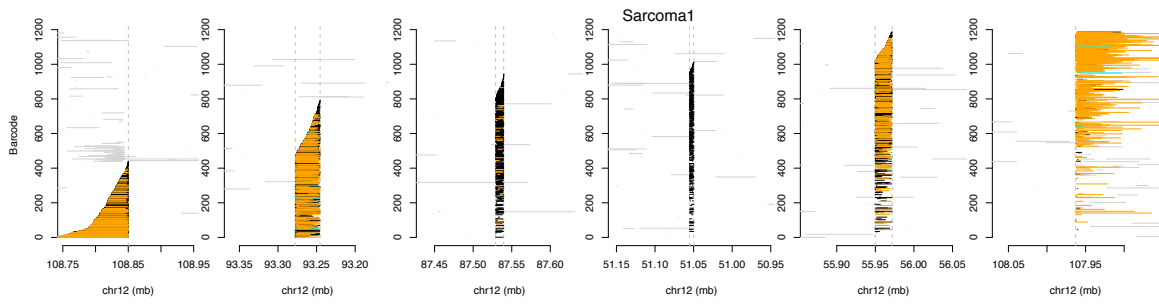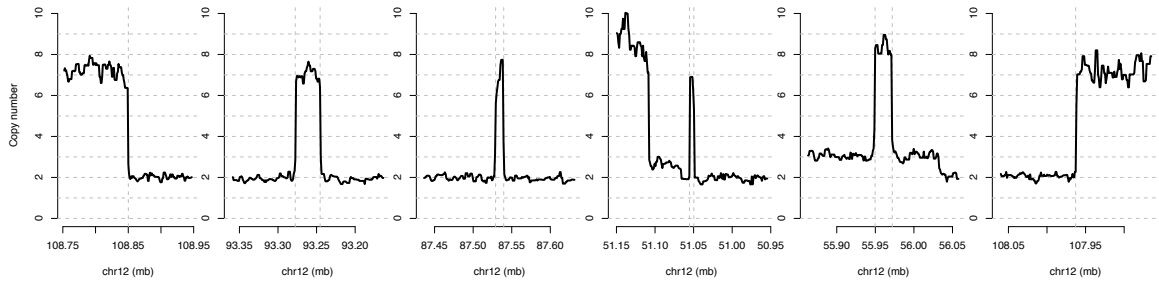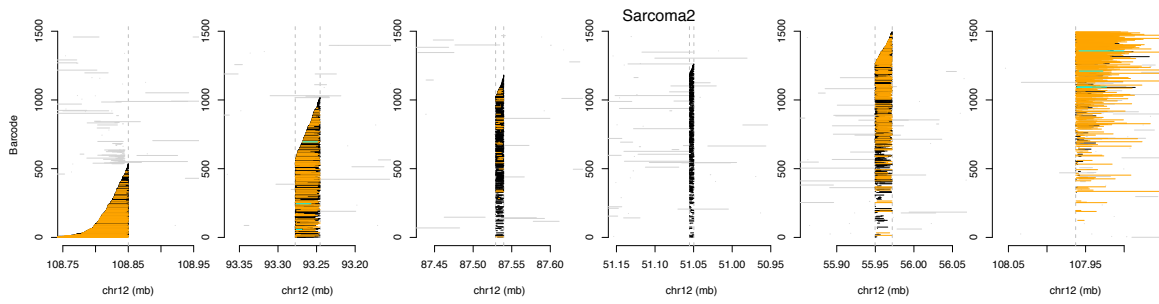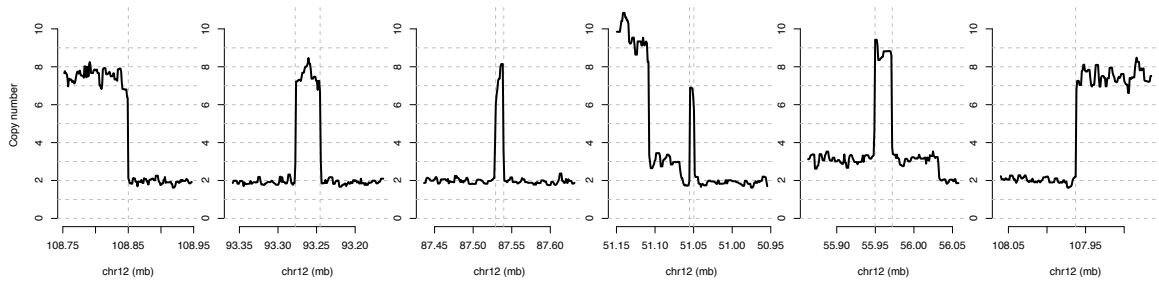

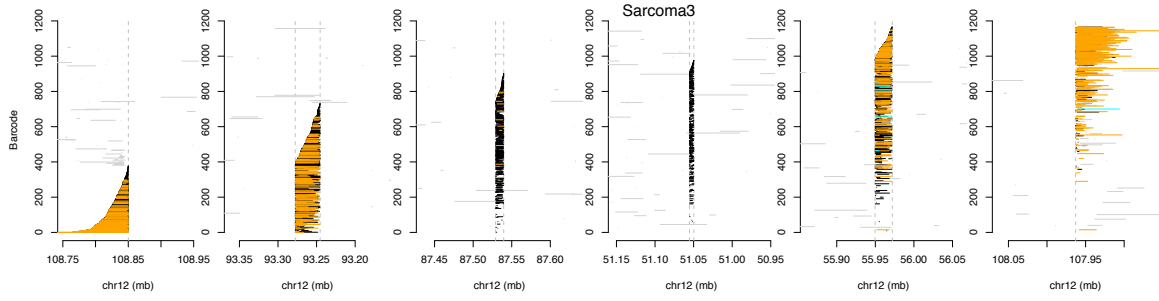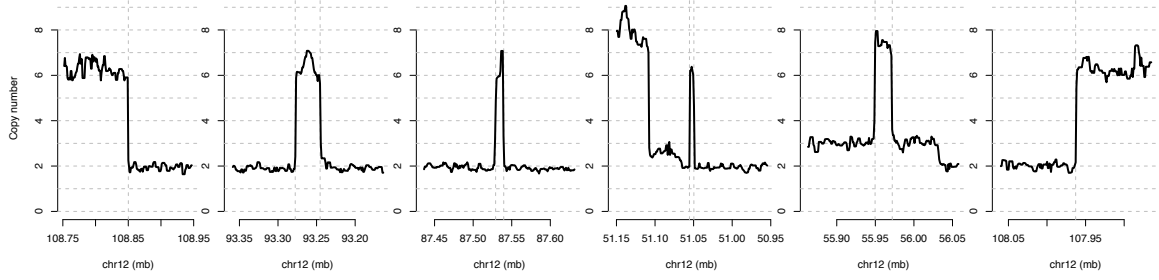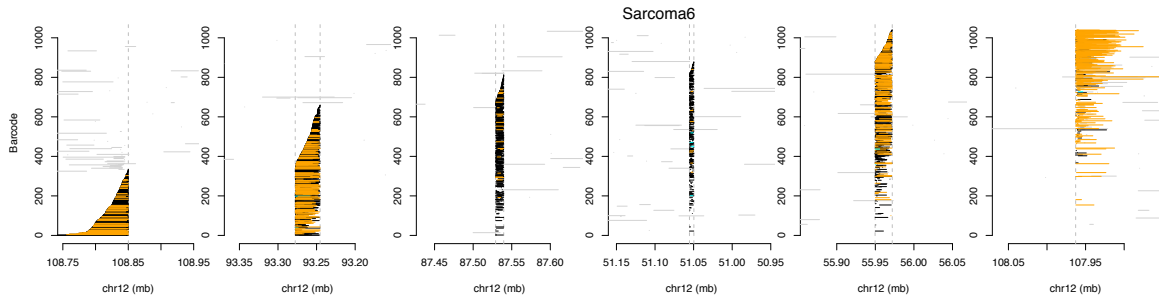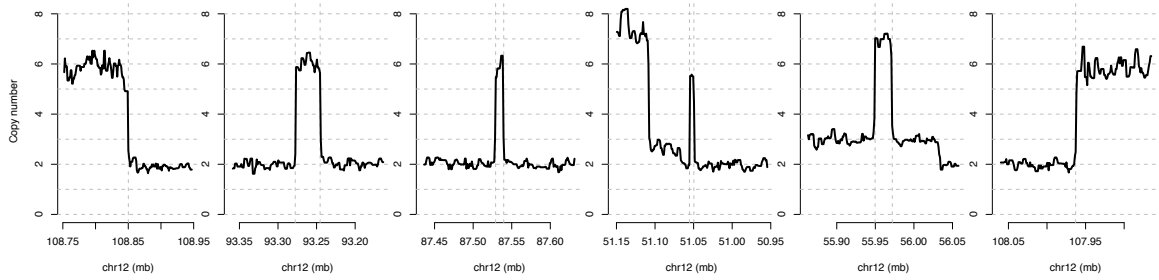

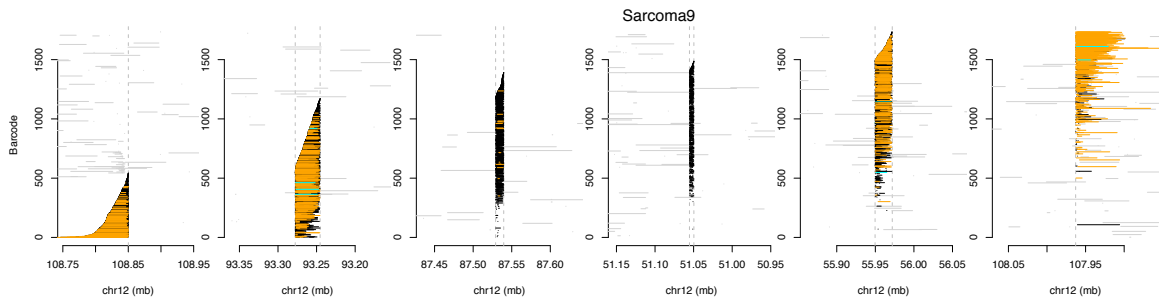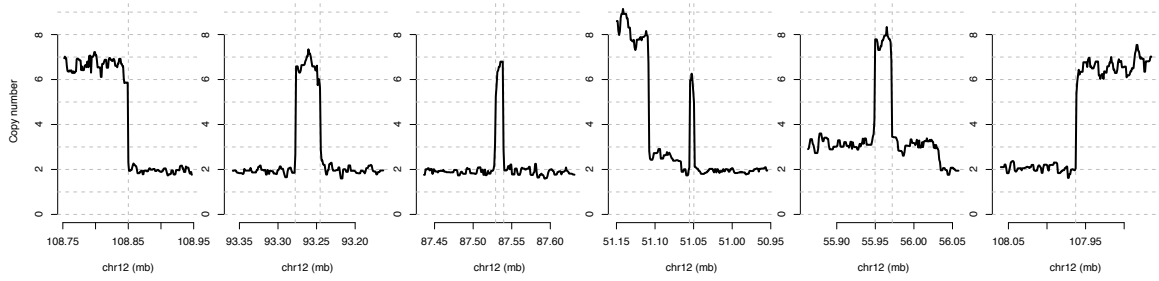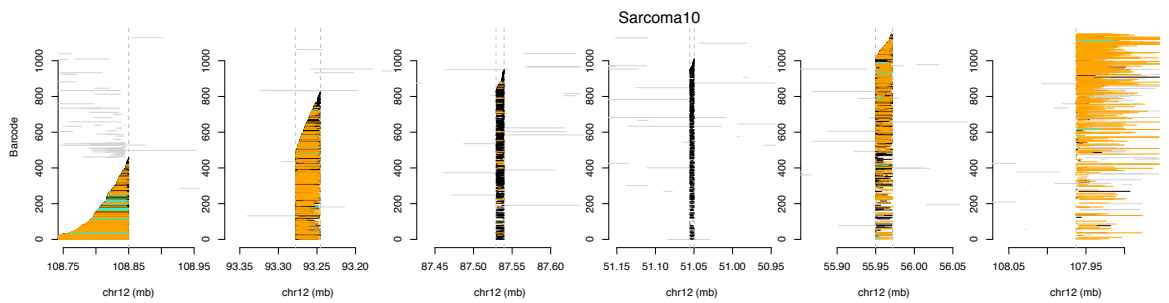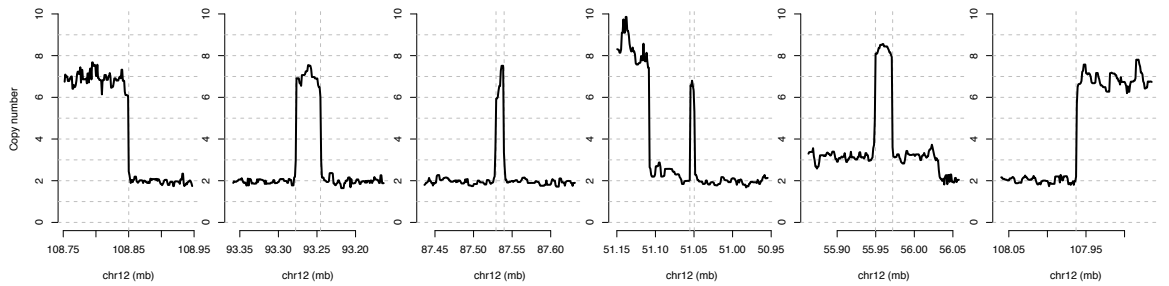

## Supplementary Note 2 – Detection of smaller structural variants

As described in the main text, the barcode patterns used by GROC-SVs to detect SVs provide a high signal to background ratio for detecting large-scale structural variation, such as frequently found in tumors. However, barcode patterns are similar between genomic loci that are close to one another and thus the SV detection algorithm used by GROC-SVs is expected to exhibit lower sensitivity and specificity for SVs that are smaller than the average long-fragment length. Practically, GROC-SVs is unable to find SVs smaller than 10kb in data from standard 10x libraries.

To assess the ability of GROC-SVs to detect smaller SVs, we applied GROC-SVs to the NA12878 genome, for which comprehensive SV callsets and sequencing data are available. GROC-SVs identified 36 high-confidence candidate SVs in NA12878, of which 17 (47%) were corroborated using mate-pair data (Eberle 2017). When considering a more inclusive set of SVs, including additional lower confidence SVs, 56/227 (25%) of GROC-SVs calls were corroborated by mate-pair data.

Out of this inclusive set of SVs called by GROC-SVs, 43 perfectly or partially overlapped SVs described in Pendleton et al (2015), which were called using Pacific Biosciences long reads. For comparison, when considering only the Pendleton deletions of size  $\geq 10$ kb (this was the only SV type identified in that size range), we found that 60/228 (26%) were corroborated by mate-pair data. We note that we used mate-pair data for validation because that sequencing platform is orthogonal to both the PacBio-based calls made by Pendleton and the 10x-based calls made by GROC-SVs.

### References

- Eberle MA, Fritzilas E, Krusche P, Källberg M, Moore BL, Bekritsky MA, Iqbal Z, Chuang HY, Humphray SJ, Halpern AL, Kruglyak S, Margulies EH, et al. A reference data set of 5.4 million phased human variants validated by genetic inheritance from sequencing a three-generation 17-member pedigree. *Genome Res.* 2017 Jan;27(1):157-164. doi: 10.1101/gr.210500.116.
- Pendleton M, Sebra R, Pang AW, Ummat A, Franzen O, Rausch T, Stütz AM, Stedman W, Anantharaman T, Hastie A, Dai H, Fritz MH, et al. Assembly and diploid architecture of an individual human genome via single-molecule technologies. *Nat Methods.* 2015 Aug;12(8):780-6. doi: 10.1038/nmeth.3454

|                                                     | Sarcoma0         | Sarcoma1         | Sarcoma2         | Sarcoma3        | Sarcoma6        | Sarcoma9         | Sarcoma10        | SarcomaC        | HCC1143         | HCC1143_BL   |
|-----------------------------------------------------|------------------|------------------|------------------|-----------------|-----------------|------------------|------------------|-----------------|-----------------|--------------|
| 10%                                                 | 8,625            | 3,956            | 4,974            | 1,964           | 4,783           | 6,754            | 5,122            | 2,601           | 1,498           | 1,271        |
| 25%                                                 | 25,824           | 17,573           | 20,327           | 9,025           | 14,884          | 22,835           | 21,980           | 11,043          | 5,304           | 3,909        |
| 50%                                                 | 43,070           | 44,840           | 44,476           | 26,709          | 32,406          | 38,706           | 51,708           | 28,742          | 21,369          | 14,843       |
| 75%                                                 | 56,244           | 62,231           | 61,171           | 47,739          | 51,483          | 48,691           | 70,101           | 43,055          | 57,011          | 43,208       |
| 90%                                                 | 70,559           | 79,806           | 75,906           | 59,464          | 62,901          | 56,907           | 100,961          | 52,677          | 106,764         | 85,675       |
| 95%                                                 | 81,163           | 95,388           | 87,497           | 66,166          | 70,829          | 62,395           | 124,431          | 58,197          | 147,857         | 122,273      |
| mean                                                | 42,366           | 43,730           | 43,183           | 29,590          | 34,258          | 35,903           | 52,443           | 28,392          | 41,331          | 32,608       |
| std                                                 | 24,497           | 30,186           | 27,888           | 22,465          | 23,227          | 18,887           | 37,903           | 19,285          | 53,562          | 45,907       |
| Physical depth<br>( $C_F$ )                         | 350.6 ±<br>189.1 | 195.0 ±<br>107.9 | 236.0 ±<br>142.8 | 189.5 ±<br>95.9 | 203.1 ±<br>90.2 | 272.9 ±<br>143.5 | 215.3 ±<br>125.8 | 209.0 ±<br>34.0 | 144.3 ±<br>68.5 | 126.2 ± 24.6 |
| Read coverage<br>per fragment<br>position ( $C_R$ ) | 0.07 ± 0.10      | 0.13 ± 0.15      | 0.11 ± 0.13      | 0.14 ± 0.16     | 0.11 ± 0.12     | 0.08 ± 0.10      | 0.10 ± 0.10      | 0.12 ± 0.15     | 0.34 ±<br>0.20  | 0.27 ± 0.21  |
| Barcodes (after<br>filtering)                       | 166,892          | 157,257          | 168,818          | 164,865         | 172,893         | 183,770          | 167,595          | 176,451         | 700,176         | 651,125      |

**Supplementary Table 1: 10x sequencing library statistics.**

Fragment lengths (top rows, in bp) for size-selected sarcoma libraries and HCC1143 breast cancer cell line. Physical depth  $C_F$  indicates the average fold-coverage of each genomic position by inferred long fragments. Read coverage  $C_R$  indicates the average coverage of each long fragment by short reads. Note that since  $C_R$  is less than 1.0, many positions in each long fragment are not covered by short-reads. Barcodes indicates the number of different molecular partitions analyzed by GROC-SVs (note that some low-quality molecular partitions are filtered as described in the methods).
